# Supplementary material for: Evaluation of the 8th Edition AJCC Staging System for the Clinical Staging of Pancreatic Cancer
Source: MDPI journal article supplement (doi:10.3390/cancers14194672), 2022-09-26
Supplement: s1 [file s1]

## Supplementary Materials

### Evaluation of the 8th Edition AJCC Staging System for the Clinical Staging of Pancreatic Cancer

**Supplementary material S1.** Detailed information of neoadjuvant and adjuvant therapy.

| <b>Neoadjuvant therapy (n=100)</b>             |            |
|------------------------------------------------|------------|
| CCRT with 5-FU                                 | 49 (49.0%) |
| CCRT with gemcitabine                          | 13 (13.0%) |
| FOLFIRINOX                                     | 20 (20.0%) |
| Gemcitabine based CTx <sup>†</sup>             | 10 (10.0%) |
| Other CTx <sup>*</sup>                         | 8 (8.0%)   |
| <b>Adjuvant therapy (n=129)</b>                |            |
| Gemcitabine monotherapy                        | 97 (75.2%) |
| Gemcitabine based combination CTx <sup>‡</sup> | 4 (3.1%)   |
| 5-FU monotherapy                               | 11 (8.5%)  |
| 5-FU based combination CTx <sup>‡‡</sup>       | 17 (13.2%) |

Abbreviations: CCRT, concurrent chemoradiotherapy; 5-FU, 5-fluorouracil; CTx, chemotherapy. <sup>†</sup> Includes eight gemcitabine + erlotinib, one gemcitabine + nab-paclitaxel, and one gemcitabine therapy. <sup>\*</sup> Includes three capecitabine, three tegafur/uracil, and two 5-fluorouracil therapy. <sup>‡</sup> Includes three gemcitabine + erlotinib, and one gemcitabine + capecitabine therapy. <sup>‡‡</sup> Includes twelve 5-fluorouracil + etoposide + cisplatin, and five 5-fluorouracil + cisplatin therapy.

**Supplementary material S2.** Kaplan–Meier estimates of overall survival of stage groups according to the AJCC staging system, 8th edition in patient with confirmed adenocarcinoma **(A)** Comparison of stages (from I to IV), **(B)** Comparison of substages (from IA to IIB).

**(A)**

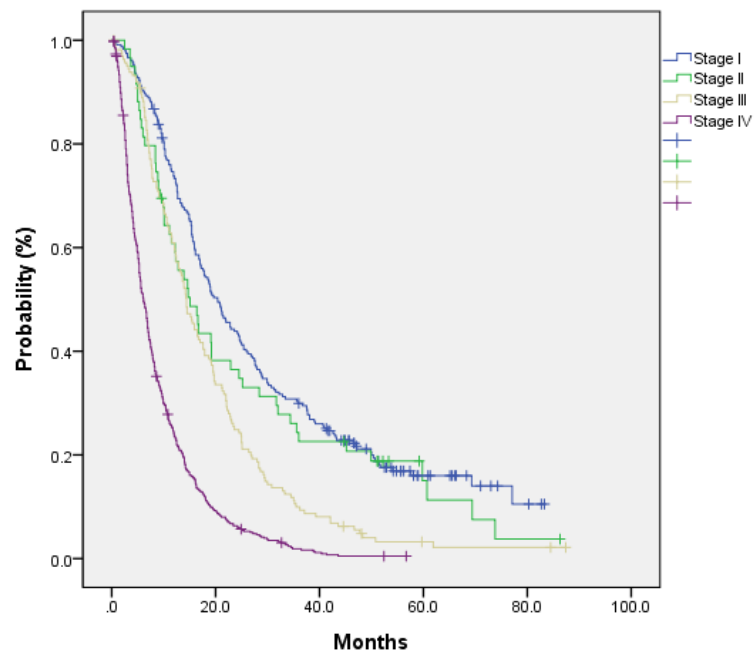

| Stage group | Median OS, months (95% CI) |                  |                  |
|-------------|----------------------------|------------------|------------------|
| I (n=234)   | 20.4 (17.3–23.5)           |                  |                  |
| II (n=59)   | 15.1 (11.0–19.2)           |                  |                  |
| III (n=163) | 14.4 (12.5–16.3)           |                  |                  |
| IV (n=486)  | 6.1 (5.4–6.8)              |                  |                  |
| <i>P</i>    | I                          | II               | III              |
| I           |                            |                  |                  |
| II          | 0.225                      |                  |                  |
| III         | <b>&lt;0.001</b>           | <b>0.026</b>     |                  |
| IV          | <b>&lt;0.001</b>           | <b>&lt;0.001</b> | <b>&lt;0.001</b> |

(B)

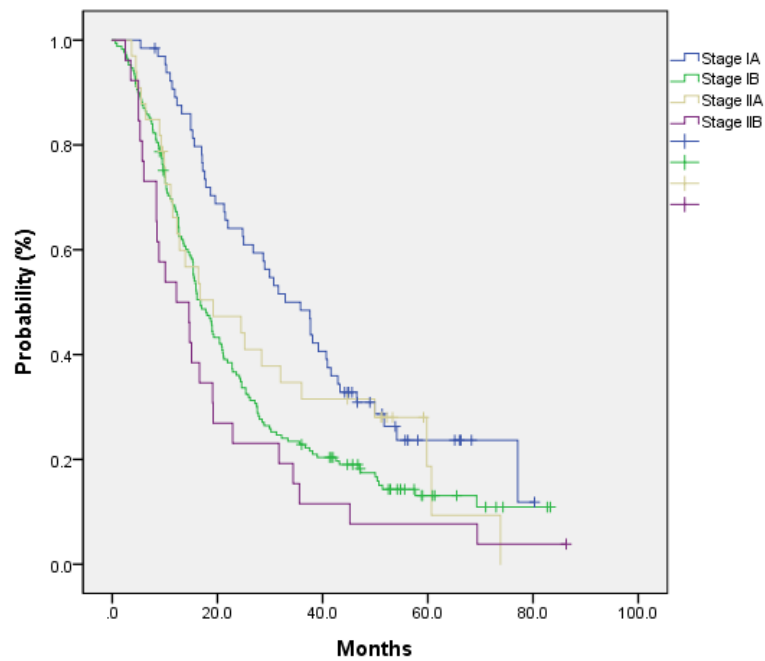

| Stage group | Median OS, months (95% CI) |  |  |
|-------------|----------------------------|--|--|
| IA (n=65)   | 35.8 (27.3–44.3)           |  |  |
| IB (n=169)  | 16.8 (14.3–19.3)           |  |  |
| IIA (n=33)  | 19.2 (4.7–33.7)            |  |  |
| IIB (n=26)  | 12.2 (5.0–19.4)            |  |  |

| P   | IA     | IB    | IIA   |
|-----|--------|-------|-------|
| IA  |        |       |       |
| IB  | <0.001 |       |       |
| IIA | 0.128  | 0.357 |       |
| IIB | <0.001 | 0.109 | 0.095 |

**Supplementary material S3.** Overall survival of non-metastatic pancreatic adenocarcinoma patients according to the AJCC staging system, 8th edition stratified by N staging.

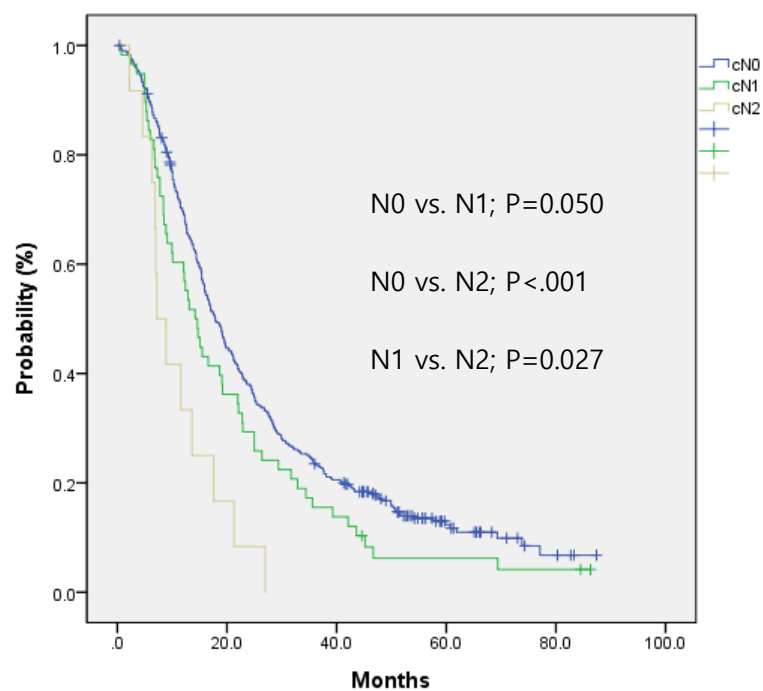

| N stage    | Median OS, months (95% CI) |
|------------|----------------------------|
| N0 (n=386) | 17.9 (16.0–19.8)           |
| N1 (n=58)  | 14.2 (10.8–17.6)           |
| N2 (n=12)  | 7.2 (4.0–10.4)             |
